# Supplementary material for: Spatial distribution of FoxP3+ and CD8+ tumour infiltrating T cells reflects their functional activity
Source: PubMed Central journal article supplement (PMC5312390; doi:10.18632/oncotarget.11039), 2016-08-03
Supplement: oncotarget-07-60383-s001.pdf [file oncotarget-07-60383-s001.pdf]

## Spatial distribution of FoxP3+ and CD8+ tumour infiltrating T cells reflects their functional activity

### SUPPLEMENTARY FIGURES AND TABLES

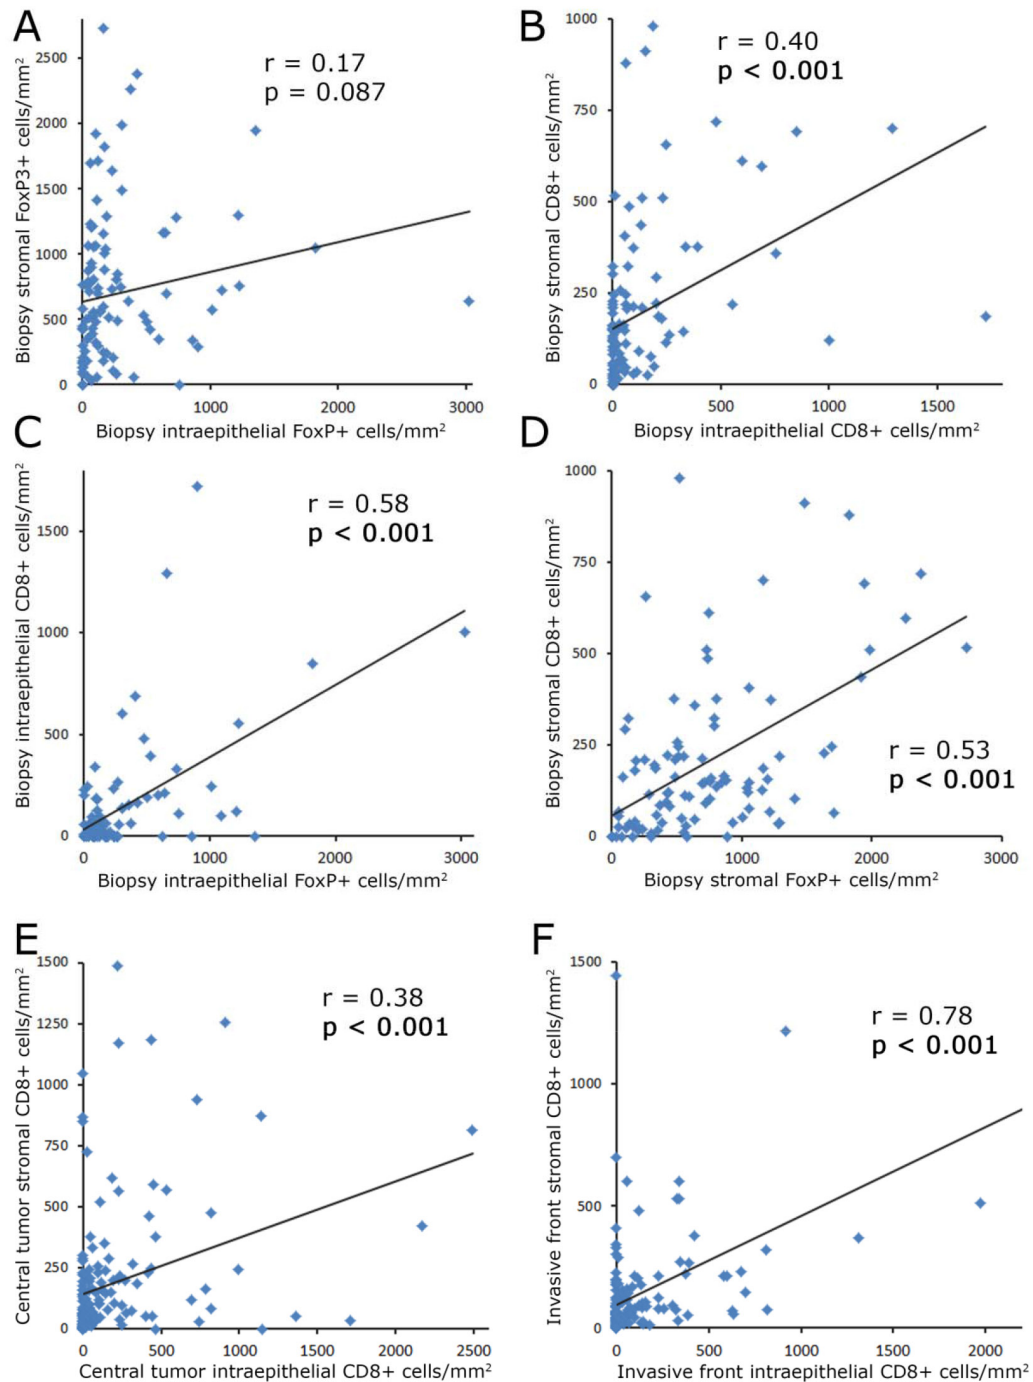

**Supplementary Figure S1: Correlation of cell densities in the stromal and epithelial compartment.** Cell densities in pre-RCT biopsies: Epithelial FoxP3+ cells compared to stromal FoxP3+ cells **A**.; epithelial CD8+ cells compared to stromal CD8+ cells **B**.; epithelial FoxP3+ cells compared to epithelial CD8+ cells **C**.; stromal FoxP3+ cells compared to stromal CD8+ cells **D**. Cell densities in post-RCT tumour resections: epithelial CD8+ cells compared to stromal CD8+ cells in the central tumour region **E**. and in the invasive front **F**.

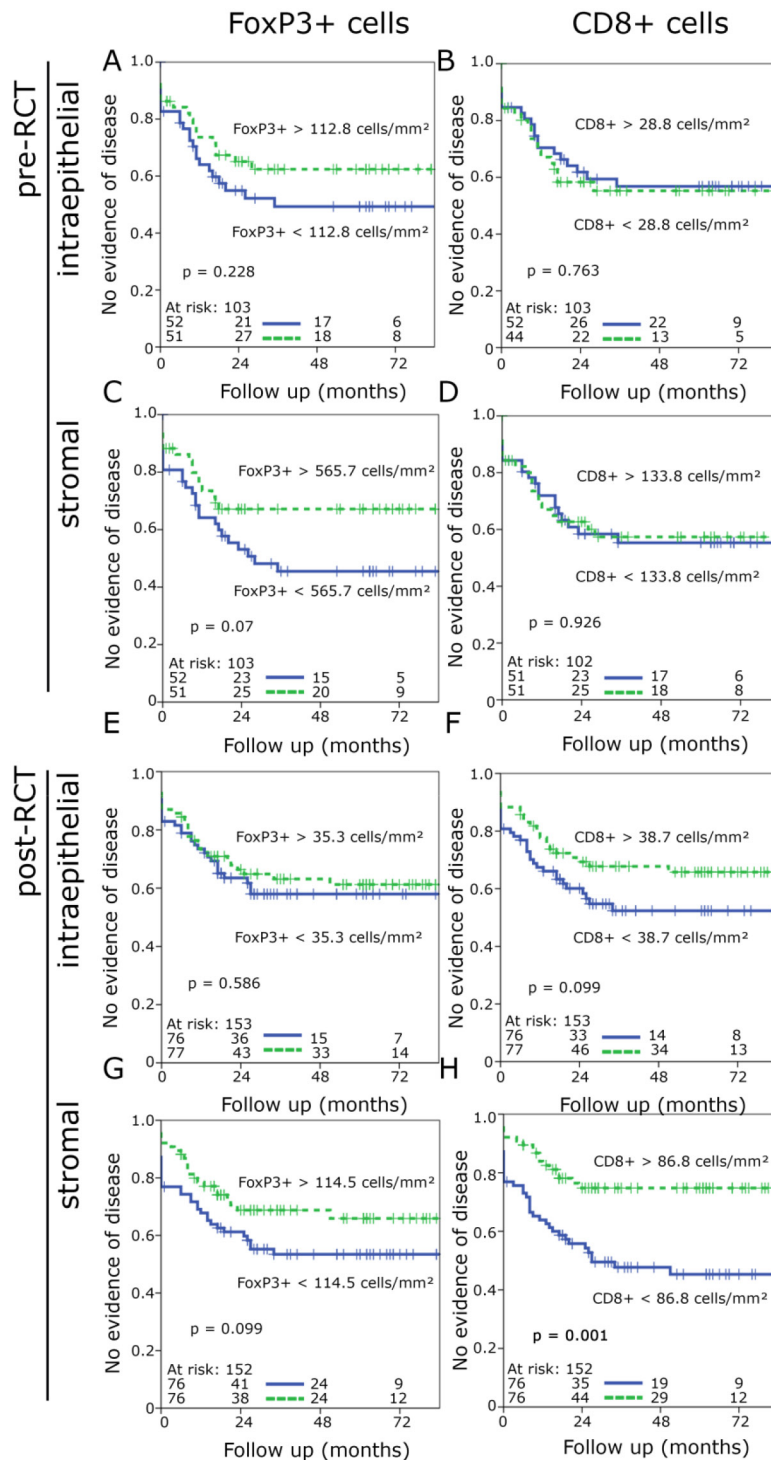

**Supplementary Figure S2: Kaplan-Meier plots for the densities of FoxP3+ and CD8+ cells in the stromal and epithelial compartment of pre RCT biopsies and in post RCT central tumour (no evidence of disease survival).** FoxP3+ density epithelial pre RCT biopsies **A**. CD8+ density epithelial pre RCT biopsies **B**. FoxP3+ density stromal pre RCT biopsies **C**. CD8+ density stromal pre RCT biopsies **D**. FoxP3+ density epithelial post RCT central tumour **E**. CD8+ density epithelial post RCT central tumour **F**. FoxP3+ density stromal post RCT central tumour **G**. CD8+ density stromal post RCT central tumour **H**.

CD8+ cells

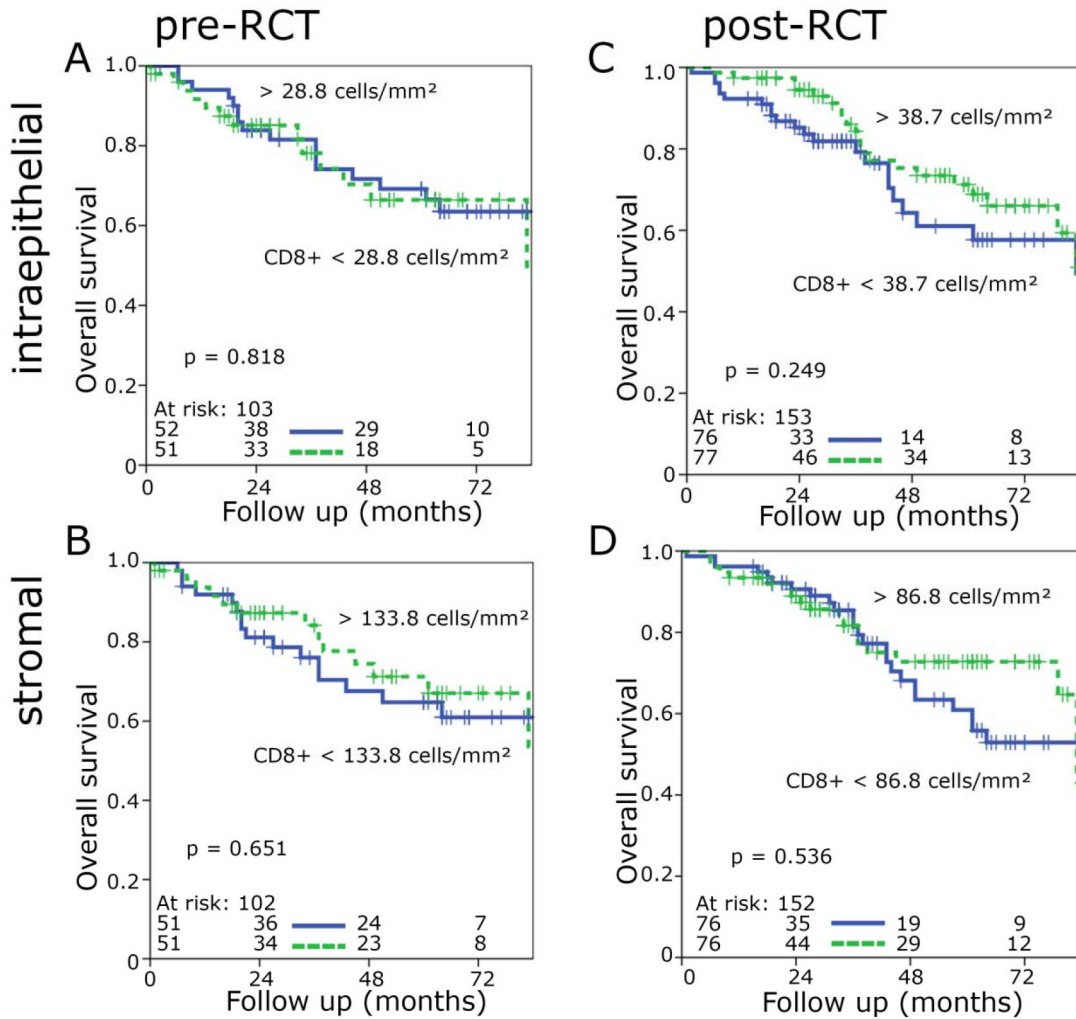

**Supplementary Figure S3: Kaplan-Meier plots for the densities of CD8+ cells in the stromal and epithelial compartment of pre RCT biopsies and in post RCT central tumour (overall survival).** CD8+ density epithelial pre RCT biopsies **A.**, CD8+ density stromal pre RCT biopsies **B.**, CD8+ density epithelial post RCT central tumour **C.**, CD8+ density stromal post RCT central tumour **D.**

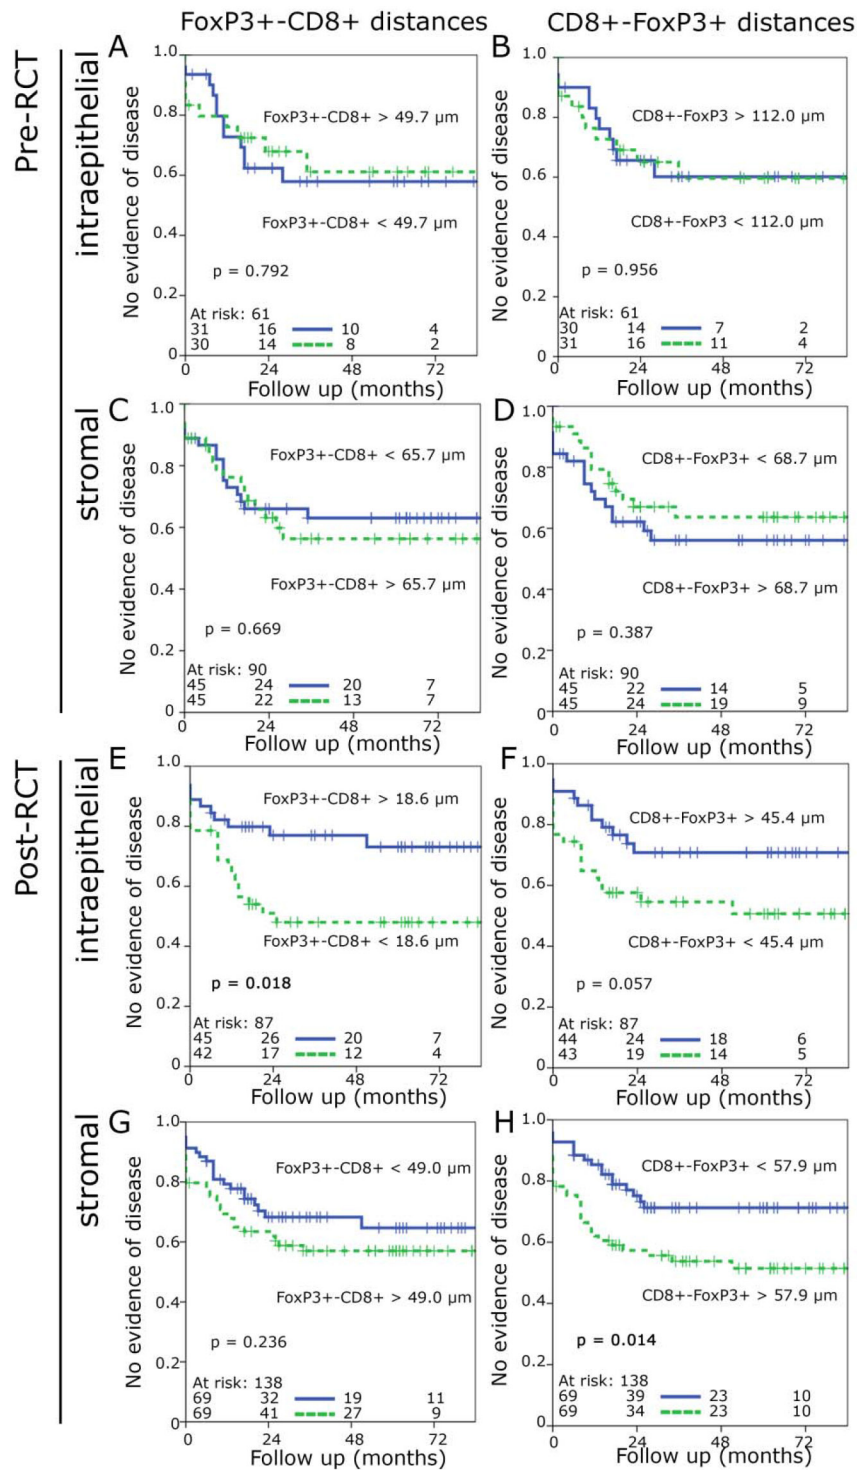

**Supplementary Figure S4: Kaplan-Meier plots for the cell-cell distances of FoxP3+-CD8+ and CD8+-FoxP3+ cells in the stromal and epithelial compartment pre and post RCT in the central tumour (no evidence of disease survival).** FoxP3+-CD8+ epithelial pre RCT biopsies **A.**, CD8+-FoxP3+ epithelial pre RCT biopsies **B.** FoxP3+-CD8+ stromal pre RCT biopsies **C.** CD8+-FoxP3+ stromal pre RCT biopsies **D.** FoxP3+-CD8+ epithelial post RCT central tumour **E.** CD8+-FoxP3+ epithelial post RCT central tumour **F.** FoxP3+-CD8+ stromal post RCT central tumour **G.** CD8+-FoxP3+ stromal post RCT central tumour **H.**

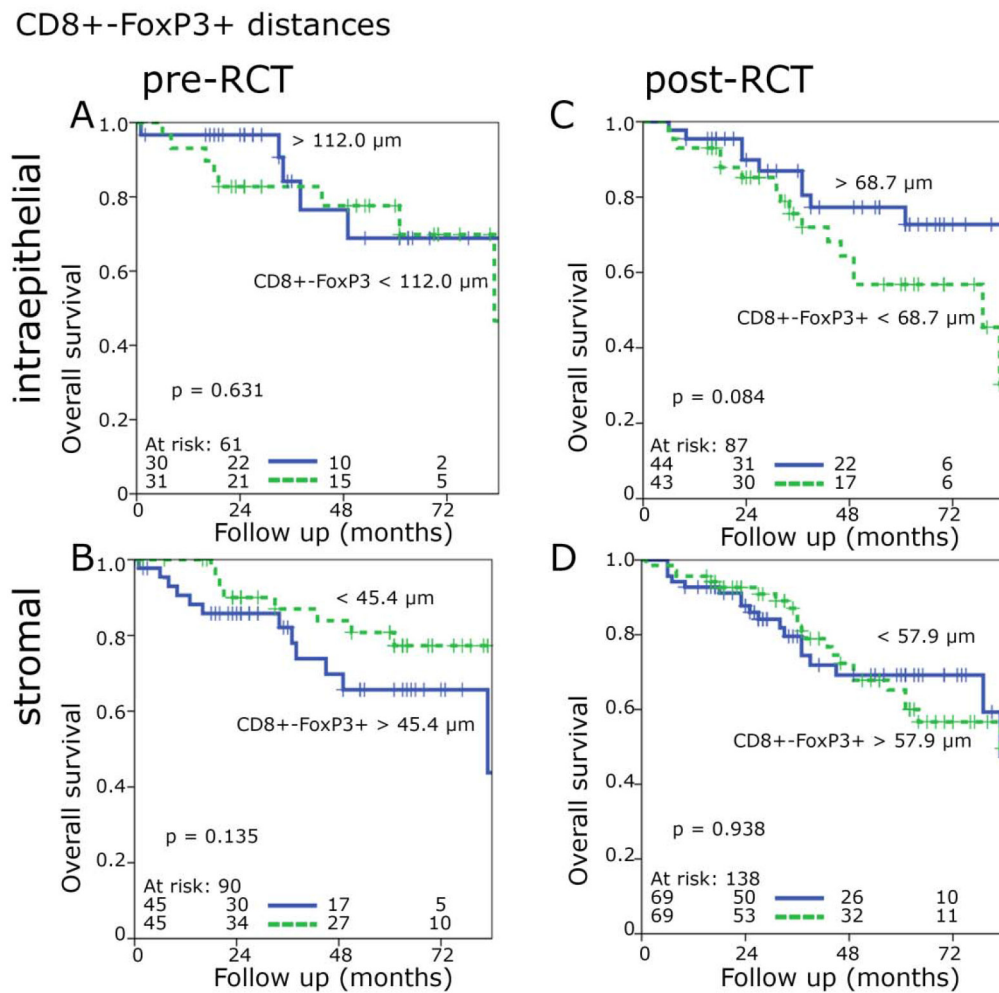

**Supplementary Figure S5: Kaplan-Meier plots for the cell-cell distances of CD8+-FoxP3+ cells in the stromal and epithelial compartment pre and post RCT in the central tumour (overall survival).** CD8+-FoxP3+ epithelial pre RCT biopsies **A.**, CD8+-FoxP3+ stromal pre RCT biopsies **B.**, CD8+-FoxP3+ epithelial post RCT central tumour **C.**, CD8+-FoxP3+ stromal post RCT central tumour **D.**

**Supplementary Table S1: Correlations between CD8+ or FoxP3+ cells in different compartments, prior RCT (biopsy) or post RCT (central tumour, invasive front), respectively.**

| <b>tissue</b>  | <b>compartment</b> | <b>TIC</b> |   | <b>tissue</b>  | <b>compartment</b> | <b>TIC</b> | <b>patients</b> | <b>r</b> | <b>p</b> |
|----------------|--------------------|------------|---|----------------|--------------------|------------|-----------------|----------|----------|
| biopsy         | intraepithelial    | FoxP3      | - | biopsy         | intraepithelial    | CD8        | 103             | 0.582    | < 0.001  |
| biopsy         | stromal            | FoxP3      | - | biopsy         | stromal            | CD8        | 103             | 0.529    | < 0.001  |
| biopsy         | intraepithelial    | CD8        | - | biopsy         | stromal            | CD8        | 105             | 0.400    | < 0.001  |
| central tumour | intraepithelial    | FoxP3      | - | central tumour | intraepithelial    | CD8        | 153             | 0.480    | < 0.001  |
| central tumour | intraepithelial    | FoxP3      | - | central tumour | stromal            | CD8        | 152             | 0.481    | < 0.001  |
| central tumour | stromal            | FoxP3      | - | central tumour | stromal            | CD8        | 152             | 0.281    | < 0.001  |
| central tumour | intraepithelial    | CD8        | - | central tumour | stromal            | CD8        | 152             | 0.317    | < 0.001  |
| central tumour | stromal            | CD8        | - | invasive front | stromal            | CD8        | 112             | 0.383    | < 0.001  |
| invasive front | intraepithelial    | CD8        | - | invasive front | stromal            | CD8        | 128             | 0.776    | < 0.001  |
